# Supplementary figures and images for: Stratification of inflammatory bowel disease outpatients by disease activity and risk of complications to guide out-of-hospital monitoring: a patient-centred quality improvement project
Source: PubMed Central journal article supplement — BMJ Open Qual. 2019 Aug 1;8(3):e000546. doi: 10.1136/bmjoq-2018-000546 (PMC6683110; doi:10.1136/bmjoq-2018-000546), 2019-08-01

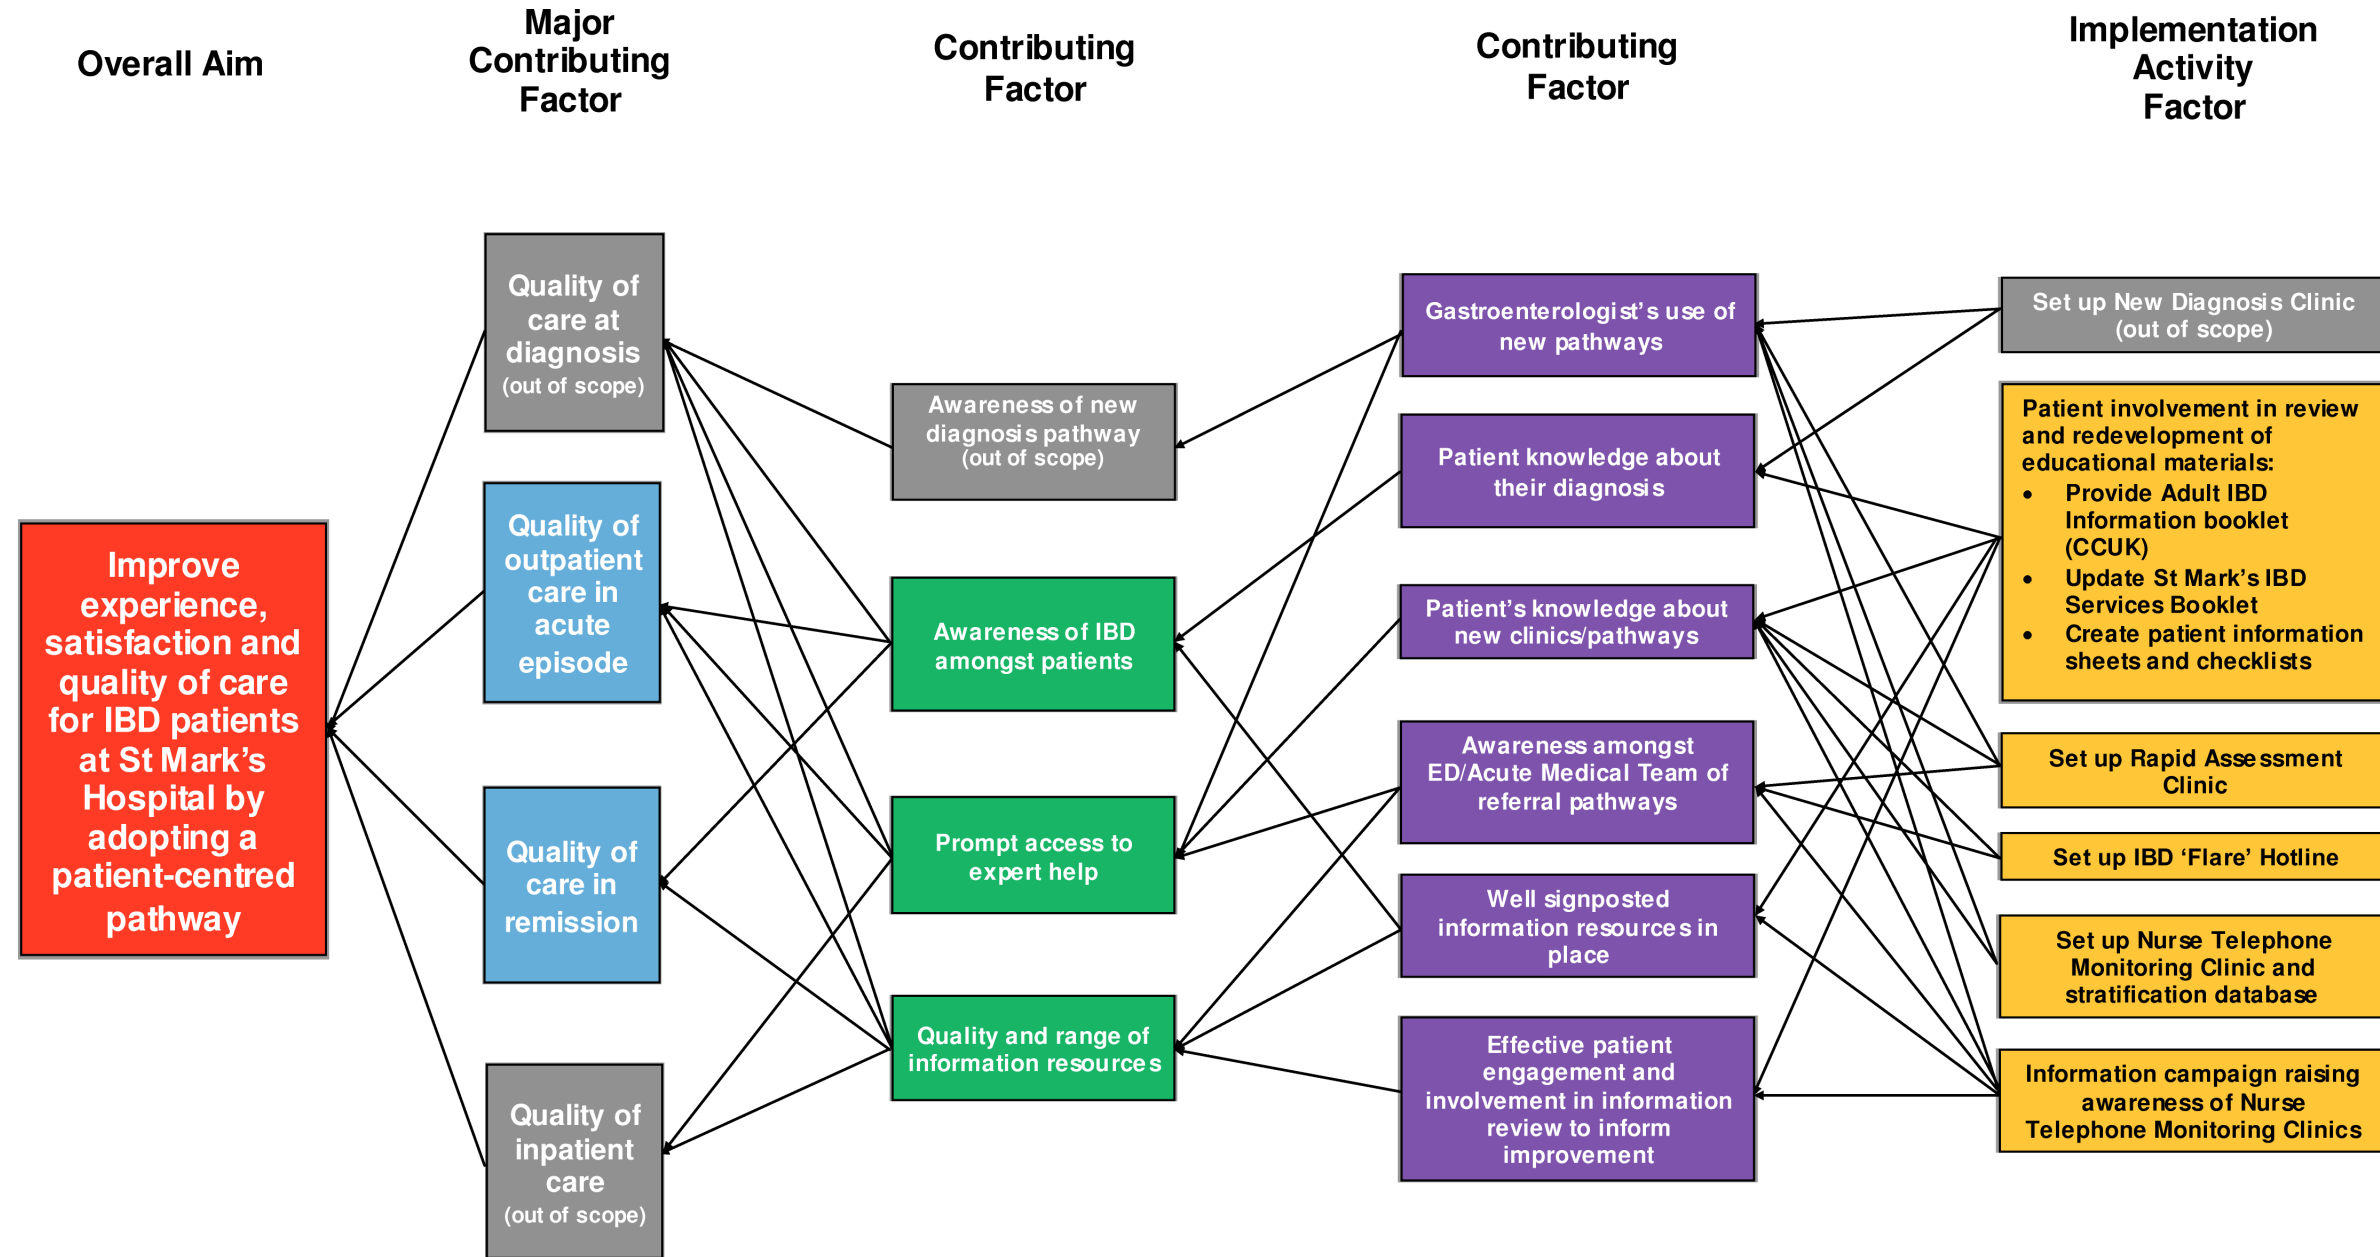

Supplement: bmjoq-2018-000546supp001.pdf [file bmjoq-2018-000546supp001.pdf]

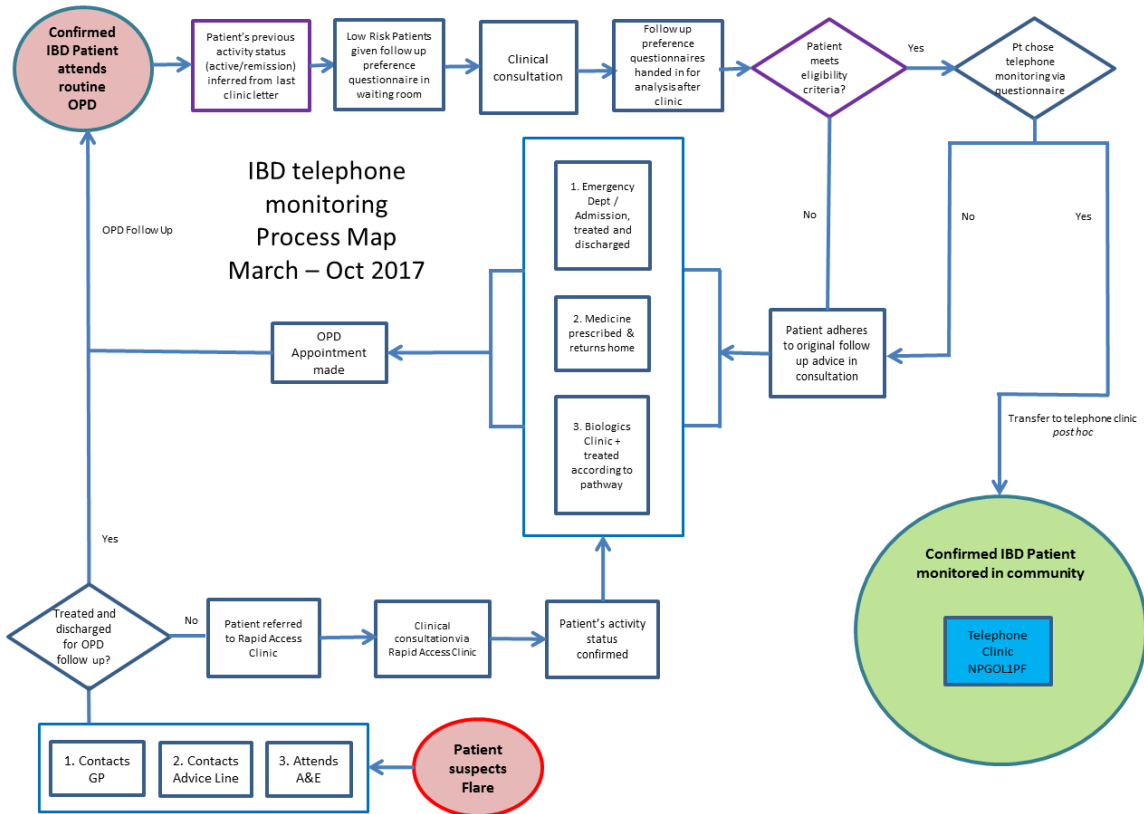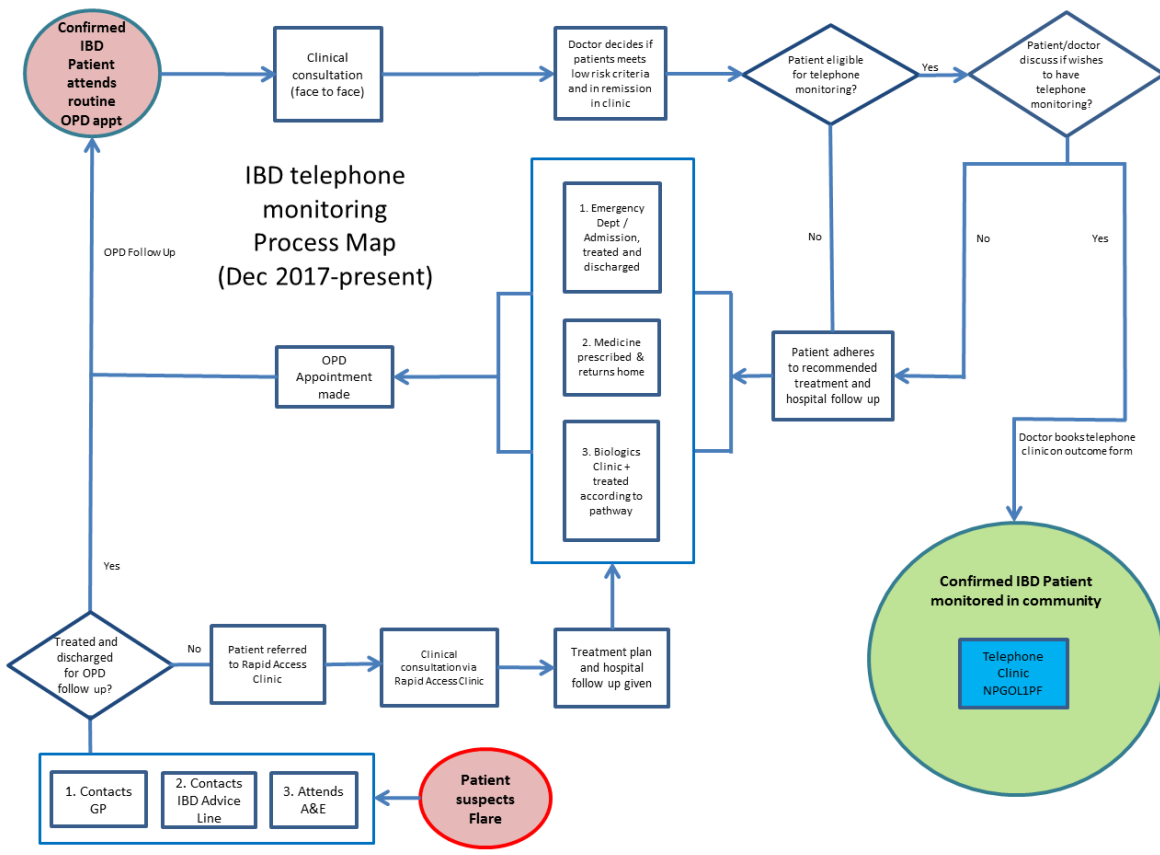

Supplement: bmjoq-2018-000546supp002.pdf [file bmjoq-2018-000546supp002.pdf]
